# Supplementary material
Source: PubMed Central journal article supplement (PMC2896304)
Supplement: NIHMS204642-supplement-SI.pdf [file NIHMS204642-supplement-SI.pdf]

## SUPPLEMENTAL INFORMATION

### *EPR Fitting and Quantitation*

The signal for the ferric species of N694C was simulated with an effective spin  $S' = 1/2$  Hamiltonian (Figures 3B), with the parameters given in Table S1 (see Figure S1 for simulated spectra). Four rhombic doublets (centered at  $g \sim 4.3$ ) and one axial doublet ( $g = 6$ ) were required for the simulation.<sup>a</sup> The axial simulation parameters were used previously for WT sLO, while the rhombic simulations are distinct from that published for N694H/Fe<sup>III</sup> and for N694G/Fe<sup>III</sup>.<sup>1, 2</sup> It should be noted that for all of the rhombic signal simulations, it was difficult to match the variability of the  $g$ -strain of each  $g$ -component. Therefore, these simulations are approximations to the true signal shape. Four rhombic doublets were required because one would not adequately fit the broad base of the  $g \sim 4.3$  signal. These four rhombic components are considered as a single species in the following discussion. The simulation areas were adjusted for the  $g$ -value differences of the rhombic and axial signals as described by Aasa and Vangård and linewidth broadening was applied to each  $g$ -value.<sup>3</sup>

The simulated spectra were integrated over the entire field range to obtain the total EPR intensity from transitions within the middle Kramers doublet for the rhombic signal and the  $M_S = \pm 1/2$  for the axial signal. Fe<sup>III</sup>-EDTA was used as a standard for spin quantitation. The double integral was evaluated between 500 and 2500 G, just below the interfering signal from adventitious Cu<sup>II</sup> at  $g$  of 2.0. Quantification of the signal intensity was dependent on the relative populations of the spin manifolds of each of the EPR active species. In order to account for the

---

<sup>a</sup> It should be noted that the feature with  $g_{\text{(eff)}}$ -values of 9.4, 1.45 and 0.9 is ascribed to the ground doublet of the rhombic  $S=5/2$  spin system. Its simulated intensity is too high (Figure 3B) due to the fact that it covers a large field range (past accessible) and is dependent on the assumption that the  $D$  value of the rhombic N694C/Fe<sup>III</sup> complex is the same as EDTA/Fe<sup>III</sup>.

spin populations of the three  $M_s$  doublets, the ZFS parameters were estimated for each species from the temperature dependence of the EPR spectral intensity over the range 3.8 - 40 K under non-saturating conditions. The temperature dependence of the  $g \sim 4.3$  signals were evaluated and their signal intensity versus temperature was approximately the same as  $\text{Fe}^{\text{III}}$ -EDTA (data not shown), indicating a  $|D|$  of approximately  $1 \text{ cm}^{-1}$  for the rhombic signal. This approximate zero-field splitting (ZFS) parameter was used to calculate the Boltzmann population distributions of the three doublets and the spin populations were corrected accordingly for the four signals at  $g \approx 4.3$ . The  $g \sim 6$  signal observed had significant spectral overlap with the other species and therefore its temperature dependence could not be obtained accurately from the EPR spectral data. Its D-value was set to  $+2 \text{ cm}^{-1}$ , based on the fact that in WT sLO-1/ $\text{Fe}^{\text{III}}$  two axial signals are observed with D values of approximately  $2 \text{ cm}^{-1}$ .

1. Holman, T. R.; Zhou, J.; Solomon, E. I., *J. Am. Chem. Soc.* **1998**, 120, 12564-12572.
2. Segreaves, E. N.; Chruszcz, M.; Neidig, M. L.; Ruddat, V.; Zhou, J.; Wecksler, A. T.; Minor, W.; Solomon, E. I.; Holman, T. R., *Biochemistry* **2006**, 45, 10233-10242.
3. Aasa, R.; Vangard, T., *J. Magn. Reson.* **1975**, 19, 308-315.

Table S1. Theoretical EPR simulation parameters

| Component     | E/D  | $g_x (\Delta g)^a$ | $g_y (\Delta g)^a$ | $g_z (\Delta g)^a$ | Contribution (%) |
|---------------|------|--------------------|--------------------|--------------------|------------------|
| Sim Rhombic 1 | 0.33 | 4.3 (0.05)         | 4.3 (0.05)         | 4.3 (0.05)         | $80 \pm 8^b$     |
| Sim Rhombic 2 | 0.31 | 4.4 (0.05)         | 4.3 (0.1)          | 4.1 (0.1)          |                  |
| Sim Rhombic 3 | 0.29 | 4.5 (0.05)         | 4.2 (0.2)          | 4.0 (0.2)          |                  |
| Sim Rhombic 4 | 0.29 | 4.5 (0.1)          | 4.2 (0.5)          | 4.0 (0.5)          |                  |
| Sim Axial     | 0.0  | 6.0 (0.5)          | 6.0 (0.8)          | 2.0 (0.8)          | $20 \pm 2$       |

<sup>a</sup>Linewidths in g-values at half-height of the absorption curve are given in parentheses.

<sup>b</sup>Combined contribution of all four rhombic components.

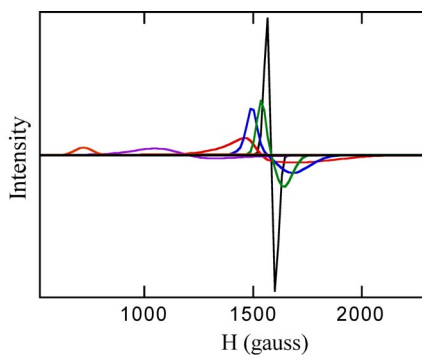

Figure S1. EPR Simulation Components for ferric N694C: sim rhombic 1 (black), sim rhombic 2 (red), sim rhombic 3 (blue), sim rhombic 4 (green), sim axial (purple) and the feature ascribed to the ground doublet of the rhombic spin system (orange).

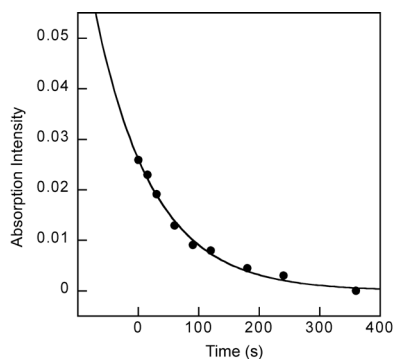

Figure S2. LA oxidation by N694C/Fe<sup>III</sup>. Decay of the Cys→Fe<sup>III</sup> CT band monitored by the decrease in absorption at 778 nm.

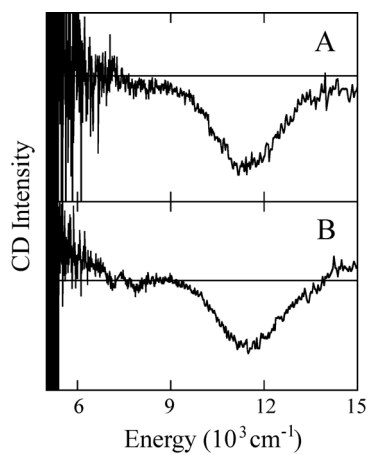

Figure S3. The 278 K CD spectrum of (A) N694C/Fe<sup>II</sup> + 60% (v/v) glycerol and (B) N694C/Fe<sup>II</sup> + oleic acid (saturating).
